# Supplementary material for: Constructing BaLi2Ti6O14@C nanofibers with a low carbon content as high-performance anode materials for Li-ion batteries
Source: Royal Society of Chemistry journal article supplement (doi:10.1039/d0nj00113a), 2020-01-01
Supplement: d0nj00113a1.pdf [file d0nj00113a1.pdf]

### Supporting information for

Constructing BaLi<sub>2</sub>Ti<sub>6</sub>O<sub>14</sub>@C nanofibers with low carbon content as high-performance anode materials for Li-ion batteries

Chao Wang,<sup>a</sup> Xing Li,<sup>abc\*</sup> Yuzhou Liu,<sup>a</sup> Nan Gao,<sup>b</sup> Xing Xin<sup>b\*</sup>

<sup>a</sup>School of Physical Science and Technology, Ningbo University, Ningbo 315211, China

<sup>b</sup>School of Material Science and Chemical Engineering, Ningbo University, Ningbo 315211, China

<sup>c</sup>Key Laboratory of Photoelectric Detection Materials and Devices of Zhejiang Province, Ningbo University, Ningbo 315211, China

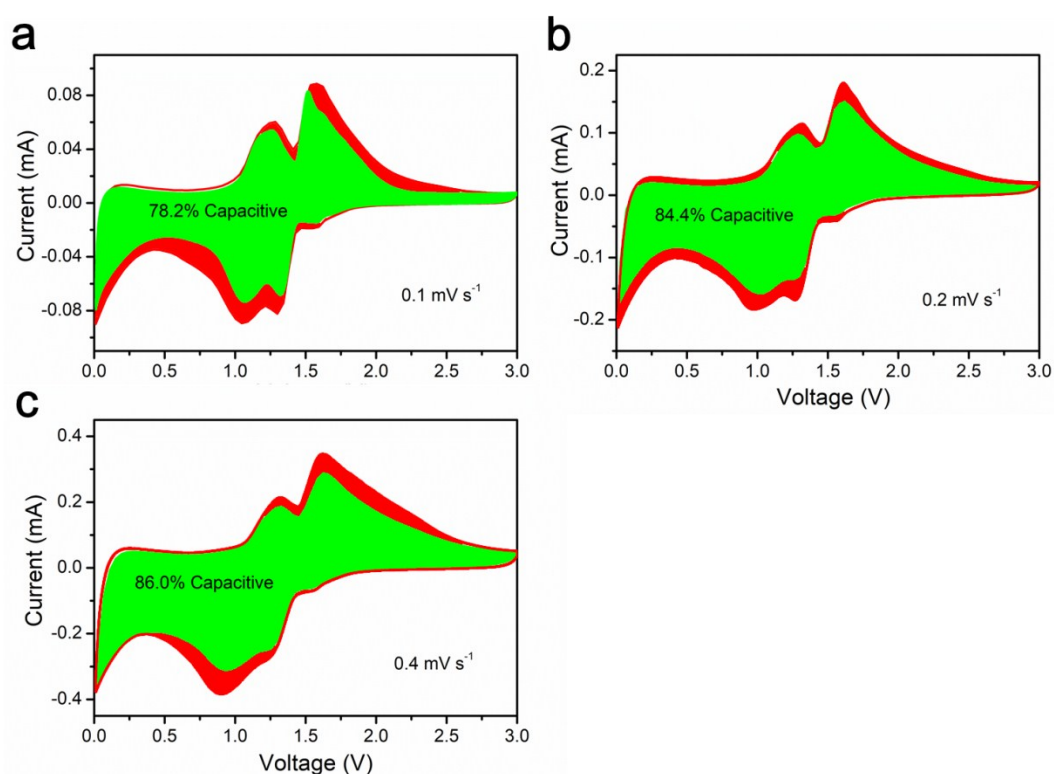

Fig. S1. CV curves and capacity contribution (green region) at 0.1, 0.2, 0.4 mV s<sup>-1</sup>

Table S1. Cycling stability comparison of MLi<sub>2</sub>Ti<sub>6</sub>O<sub>14</sub> (M=Ba, Sr, Pb, 2Na) reported in recent literatures.

| Compound                                             | Preparation     | Morphology | Cycle performance                                                                                                                    | Reference |
|------------------------------------------------------|-----------------|------------|--------------------------------------------------------------------------------------------------------------------------------------|-----------|
| BaLi <sub>2</sub> Ti <sub>6</sub> O <sub>14</sub> @C | Electrospinning | fibers     | 100 mA g <sup>-1</sup> , 300 cycles, 140.1 mAh g <sup>-1</sup> ,<br>1000 mA g <sup>-1</sup> , 800 cycles, 95.032 mAh g <sup>-1</sup> | This work |

|                                                                                       |                              |           |                                                                 |    |
|---------------------------------------------------------------------------------------|------------------------------|-----------|-----------------------------------------------------------------|----|
| BaLi <sub>2</sub> Ti <sub>6</sub> O <sub>14</sub> @Ag                                 | Solid-state method           | particles | 100 mA g <sup>-1</sup> , 100 cycles, 117.0 mAh g <sup>-1</sup>  | 1  |
| BaLi <sub>1.9</sub> Mg <sub>0.1</sub> Ti <sub>6</sub> O <sub>14</sub>                 | Solid-state method           | particles | 1000 mA g <sup>-1</sup> , 200 cycles, 90.1 mAh g <sup>-1</sup>  | 2  |
| BaLi <sub>2</sub> Ti <sub>6</sub> O <sub>14</sub>                                     | Solid-state reaction process | particles | 100 mA g <sup>-1</sup> , 100 cycles, 109 mAh g <sup>-1</sup>    | 3  |
| BaLi <sub>2</sub> Ti <sub>6</sub> O <sub>14</sub>                                     | Electrospinning              | fibers    | 100 mA g <sup>-1</sup> , 10 cycles, 133.7 mAh g <sup>-1</sup>   | 4  |
| BaLi <sub>2</sub> Ti <sub>6</sub> O <sub>14</sub>                                     | Energy-savvy auto-combustion | particles | 726 mA g <sup>-1</sup> , 10 cycles, 55 mAh g <sup>-1</sup>      | 5  |
| BaLi <sub>2</sub> Ti <sub>6</sub> O <sub>14</sub>                                     | Sol-gel synthesis            | particles | 10 mA g <sup>-1</sup> , 50 cycles, 120 mAh g <sup>-1</sup>      | 6  |
| SrLi <sub>2</sub> Ti <sub>6</sub> O <sub>14</sub>                                     | Sol-gel synthesis            | particles | 10 mA g <sup>-1</sup> , 50 cycles, 92 mAh g <sup>-1</sup>       | 6  |
| SrLi <sub>2</sub> Ti <sub>6</sub> O <sub>14</sub>                                     | Template method              | particles | 100 mA g <sup>-1</sup> , 100 cycles, 102 mAh g <sup>-1</sup>    | 7  |
| SrLi <sub>2</sub> Ti <sub>6</sub> O <sub>14</sub>                                     | Solid-state reaction         | particles | 158 mA g <sup>-1</sup> , 1000 cycles, 100.2 mAh g <sup>-1</sup> | 8  |
| SrLi <sub>2</sub> Ti <sub>6</sub> O <sub>14</sub>                                     | Solid-state reaction         | particles | 50 mA g <sup>-1</sup> , 50 cycles, 155.9 mAh g <sup>-1</sup>    | 9  |
| Sr <sub>0.95</sub> La <sub>0.05</sub> Li <sub>2</sub> Ti <sub>6</sub> O <sub>14</sub> | Solid-state process          | particles | 100 mA g <sup>-1</sup> , 100 cycles, 159.54 mAh g <sup>-1</sup> | 10 |

---

|                                                     |                                         |           |                                                                                                                                              |    |
|-----------------------------------------------------|-----------------------------------------|-----------|----------------------------------------------------------------------------------------------------------------------------------------------|----|
| $\text{SrLi}_2\text{Ti}_6\text{O}_{14}$             | Solid-state synthesis                   | particles | 0.05 C , 50 cycles,<br>115 mAh g <sup>-1</sup>                                                                                               | 11 |
| $\text{SrLi}_2\text{Ti}_6\text{O}_{14}@\text{C/N}$  | Solid-state assisted<br>solution method | particles | 100 mA g <sup>-1</sup> , 150<br>cycles, 156.58 mAh<br>g <sup>-1</sup>                                                                        | 12 |
| $\text{SrLi}_2\text{Ti}_6\text{O}_{14}@\text{C/Ag}$ | Solid-state assisted<br>solution method | particles | 100 mA g <sup>-1</sup> , 200<br>cycles, 151.2 mAh<br>g <sup>-1</sup>                                                                         | 13 |
| $\text{SrLi}_2\text{Ti}_6\text{O}_{14}/\text{Ag}$   | Sol-gel method                          | particles | 50 mA g <sup>-1</sup> , 50 cycles,<br>154.6 mAh g <sup>-1</sup>                                                                              | 14 |
| $\text{PbLi}_2\text{Ti}_6\text{O}_{14}$             | Solid state method                      | particles | 100 mA g <sup>-1</sup> , 100<br>cycles, 147.9 mAh g <sup>-1</sup>                                                                            | 15 |
| $\text{PbLi}_2\text{Ti}_6\text{O}_{14}$             | Solid state method                      | particles | 100 mA g <sup>-1</sup> , 100<br>cycles, 142.0 mAh<br>g <sup>-1</sup>                                                                         | 16 |
| $\text{PbLi}_2\text{Ti}_6\text{O}_{14}@\text{NC}$   | Solid-state method                      | particles | 500 mA g <sup>-1</sup> , 1500<br>cycles, 99.7 mAh g <sup>-1</sup>                                                                            | 17 |
| $\text{Na}_2\text{Li}_2\text{Ti}_6\text{O}_{14}$    | Electrospinning                         | fibers    | 100 mA g <sup>-1</sup> , 100<br>cycles, 116.49 mAh<br>g <sup>-1</sup> ,<br>1000 mA g <sup>-1</sup> , 800<br>cycles, 77.8 mAh g <sup>-1</sup> | 18 |
| $\text{Na}_2\text{Li}_2\text{Ti}_6\text{O}_{14}$    | Sol-gel method                          |           | 100 mA g <sup>-1</sup> , 60<br>cycles, 74 mAh g <sup>-1</sup>                                                                                | 19 |

---

|                                                  |                                                                                            |                           |                                                                                                                                     |    |
|--------------------------------------------------|--------------------------------------------------------------------------------------------|---------------------------|-------------------------------------------------------------------------------------------------------------------------------------|----|
| $\text{Na}_2\text{Li}_2\text{Ti}_6\text{O}_{14}$ | Solid-state method                                                                         | particles                 | 50 mA g <sup>-1</sup> , 50 cycles,<br>86.9 mAh g <sup>-1</sup>                                                                      | 20 |
| $\text{Na}_2\text{Li}_2\text{Ti}_6\text{O}_{14}$ | Solid-state method                                                                         | particles                 | 100 mA g <sup>-1</sup> , 50<br>cycles, 74 mAh g <sup>-1</sup>                                                                       | 21 |
| $\text{Na}_2\text{Li}_2\text{Ti}_6\text{O}_{14}$ | Solid-state method<br>and<br>Chemical deposition<br>decomposition method                   | particles                 | 100 mA g <sup>-1</sup> , 50<br>cycles, 94.2 mAh g <sup>-1</sup>                                                                     | 22 |
| $\text{Na}_2\text{Li}_2\text{Ti}_6\text{O}_{14}$ | Solid-state method                                                                         | particles                 | 100 mA g <sup>-1</sup> , 50<br>cycles, 75.2 mAh g <sup>-1</sup>                                                                     | 23 |
| $\text{Na}_2\text{Li}_2\text{Ti}_6\text{O}_{14}$ | Molten salt<br>synthesis method                                                            | whiskers and<br>particles | 100 mA g <sup>-1</sup> , 200<br>cycles, 70 mAh g <sup>-1</sup> ,<br>100 mA g <sup>-1</sup> , 500<br>cycles, 62 mAh g <sup>-1</sup>  | 24 |
| $\text{Na}_2\text{Li}_2\text{Ti}_6\text{O}_{14}$ | Sol-gel method                                                                             | particles                 | 20 mA g <sup>-1</sup> , 40 cycles,<br>114.7 mAh g <sup>-1</sup> ,<br>20 mA g <sup>-1</sup> , 40 cycles,<br>82.3 mAh g <sup>-1</sup> | 25 |
| $\text{Na}_2\text{Li}_2\text{Ti}_6\text{O}_{14}$ | Solid state reaction                                                                       | particles                 | 100 mA g <sup>-1</sup> , 50<br>cycles, 177.5 mAh g <sup>-1</sup>                                                                    | 26 |
| $\text{Na}_2\text{Li}_2\text{Ti}_6\text{O}_{14}$ | Solid-state (dry) and<br>Solution-assisted<br>(wet) sonochemical<br>Solvothermal<br>method | particles                 | 0.05 C, 50 cycles,><br>80 mAh g <sup>-1</sup> ,<br><br>0.05 C, 50 cycles, 60<br>mAh g <sup>-1</sup>                                 | 27 |
| $\text{Na}_2\text{Li}_2\text{Ti}_6\text{O}_{14}$ | Solvothermal<br>method                                                                     | particles and<br>spheres  | 50 mA g <sup>-1</sup> , 50 cycles,<br>103.9/ 104.3 mAh g <sup>-1</sup>                                                              | 28 |

|                                                  |                             |         |                     |                                                                |    |
|--------------------------------------------------|-----------------------------|---------|---------------------|----------------------------------------------------------------|----|
| $\text{Na}_2\text{Li}_2\text{Ti}_6\text{O}_{14}$ | Solvent method              | thermal | Hollow microspheres | 50 mA g <sup>-1</sup> , 50 cycles, 172.3 mAh g <sup>-1</sup> , | 29 |
| $\text{Na}_2\text{Li}_2\text{Ti}_6\text{O}_{14}$ | Sol-gel synthesis           |         | particles           | 10 mA g <sup>-1</sup> , 50 cycles, 95 mAh g <sup>-1</sup>      | 30 |
| $\text{Na}_2\text{Li}_2\text{Ti}_6\text{O}_{14}$ | Solid-state reaction method |         | particles           | 100 mA g <sup>-1</sup> , 50 cycles, 211.8 mAh g <sup>-1</sup>  | 31 |
| $\text{Na}_2\text{Li}_2\text{Ti}_6\text{O}_{14}$ | Solid state method          |         | particles           | 100 mA g <sup>-1</sup> , 50 cycles, 75.2 mAh g <sup>-1</sup>   | 32 |
| $\text{Na}_2\text{Li}_2\text{Ti}_6\text{O}_{14}$ | Solid-state method          |         | particles           | 100 mA g <sup>-1</sup> , 50 cycles, 189.2 mAh g <sup>-1</sup>  | 33 |
| $\text{Na}_2\text{Li}_2\text{Ti}_6\text{O}_{14}$ | Solid-state method          |         | particles           | 50 mA g <sup>-1</sup> , 50 cycles, 206.7 mAh g <sup>-1</sup>   | 34 |
| $\text{Na}_2\text{Li}_2\text{Ti}_6\text{O}_{14}$ | Solid state reaction method |         | particles           | 50 mA g <sup>-1</sup> , 50 cycles, 73.2 mAh g <sup>-1</sup>    | 35 |
| $\text{Na}_2\text{Li}_2\text{Ti}_6\text{O}_{14}$ | Solid-state method          |         | particles           | 500 mA g <sup>-1</sup> , 100 cycles, 136.9 mAh g <sup>-1</sup> | 36 |

1. X. T. Lin, P. F. Wang, P. Li, H. X. Yu, S. S. Qian, M. Shui, D. J. Wang, N. B. Long, J. Shu, *Electrochim. Acta*, **2015**, *186*, 24-33.
2. X. T. Lin, S. S. Qian, H. X. Yu, L. Yan, P. Li, Y. Y. Wu, N. B. Long, M. Shui, J. Shu, *Acs Sustain. Chem. Eng.*, **2016**, *4*, 4859-4867.
3. M. H. Luo, X. T. Lin, H. Lan, H. X. Yu, L. Yan, S. S. Qian, N. B. Long, M. Shui, J. Shu, *J. Electroanal. Chem.*, **2017**, *786*, 86-93.
4. X. X. Wu, X. Li, C. C. Zhu, P. Li, H. Yu, Z. Guo, J. Shu, *Mater. Today Energy*, **2016**, *1-2*, 17-23.

5. A. Chaupatnaik, P. Barpanda, *J. Mater. Res.*, **2019**, *34*, 158-168.
6. D. Dambournet, I. Belharouak, K. Amine, *Inorg. Chem.*, **2010**, *49*, 2822-2826.
7. D. Dambournet, I. Belharouak, J. Ma, K. Amine, *J. Power Sources*, **2011**, *196*, 2871-2874.
8. J. H. Liu, Y. A. Li, X. Q. Wang, Y. Gao, N. N. Wu, B. R. Wu, *J. Alloy Compd.*, **2013**, *581*, 236-240.
9. X. T. Lin, P. Li, P. F. Wang, H. X. Yu, S. S. Qian, M. Shui, X. Zheng, N. B. Long, J. Shu, *Electrochim. Acta*, **2015**, *180*, 831-844.
10. S. S. Qian, H. X. Yu, L. Yan, P. Li, H. Lan, H. J. Zhu, N. B. Long, M. Shui, J. Shu, *J. Power Sources*, **2017**, *343*, 329-337.
11. A. Dayamani, G. S. Shinde, A. Chaupatnaik, R. P. Rao, S. Adams, P. Barpanda, *J. Power Sources*, **2018**, *385*, 122-129.
12. Y. Y. Zhang, S. S. Qian, H. J. Zhu, X. Cheng, W. Q. Ye, H. X. Yu, L. Yan, M. Shui, J. Shu, *Ceram. Int.*, **2017**, *43*, 12357-12361.
13. Y. Y. Wu, S. S. Qian, H. Lan, L. Yan, H. X. Yu, X. Cheng, F. M. Ran, M. Shui, J. Shu, *Ceram. Int.*, **2017**, *43*, 7231-7236.
14. H. X. Yu, W. Q. Ye, X. Cheng, T. T. Liu, K. Goh, Z. B. Wang, J. Shu, *Ceram. Int.*, **2019**, *45*, 6885-6890.
15. P. Li, S. S. Qian, H. X. Yu, L. Yan, X. T. Lin, K. Yang, N. B. Long, M. Shui, J. Shu, *J. Power Sources*, **2016**, *330*, 45-54.
16. J. D. Zhang, H. X. Yu, N. B. Long, T. T. Liu, X. Cheng, R. T. Zheng, H. J. Zhu, W. Q. Ye, J. Shu, *Ceram. Int.*, **2018**, *44*, 9506-9513.
17. H. X. Yu, Y. F. Zhang, X. Cheng, H. J. Zhu, R. T. Zheng, T. T. Liu, J. D. Zhang, M. Shui, J. Shu, *Electrochim. Acta*, **2018**, *283*, 1460-1467.
18. C. Wang, X. Xin, M. Shu, S. P. Huang, Y. Zhang, X. Li, *Inorg. Chem. Front.*, **2019**, *6*, 866-867.
19. S. Y. Yin, L. Song, X. Y. Wang, Y. H. Huang, K. L. Zhang and Y. X. Zhang, *Electrochem. Commun.*, **2009**, *11*, 1251-1254.
20. K. Q. Wu, J. Shu, X. T. Lin, L. Y. Shao, P. Li, M. Shui, M. M. Lao, N. B. Long and D. J. Wang, *J. Power Sources*, **2015**, *275*, 419-428.
21. P. Li, K. Q. Wu, P. F. Wang, X. T. Lin, H. X. Yu, M. Shui, X. Zhang, N. B. Long and J. Shu, *Ceram. Int.*, **2015**, *41*, 14508-14516.
22. S. S. Qian, H. X. Yu, L. Yan, P. Li, X. T. Lin, Y. Bai, S. J. Wang, N. B. Long, M. Shui and J. Shu, *Ceram. Int.*, **2016**, *42*, 6874-6882.
23. J. Shu, K. Q. Wu, P. F. Wang, P. Li, X. T. Lin, L. Y. Shao, M. Shui, N. B. Long and D. J. Wang, *Electrochim. Acta*, **2015**, *173*, 595-606.
24. S. Y. Yin, C. Q. Feng, S. J. Wu, H. L. Liu, B. Q. Ke, K. L. Zhang and D. H. Chen, *J. Alloys Compd.*, **2015**, *642*, 1-6.
25. K. Q. Wu, D. J. Wang, X. T. Lin, L. Y. Shao, M. Shui, X. X. Jiang, N. B. Long, Y. L. Ren, J. Shu, *J. Electroanal. Chem.*, **2014**, *717-718*, 10-16.
26. P. F. Wang, P. Li, T. F. Yi, X. T. Lin, H. X. Yu, Y. R. Zhu, S. S. Qian, M. Shui and J. Shu, *J. Power Sources*, **2015**, *297*, 283-294.
27. S. Ghosh, Y. Kee, S. Okada and P. Barpanda, *J. Power Sources*, **2015**, *296*, 276-281.
28. S. S. Fan, H. T. Yu, Y. Xie, T. F. Yi and G. H. Tian, *Electrochim. Acta*, **2018**, *259*, 855-864.
29. S. S. Fan, H. Zhong, H. T. Yu, M. Lou, Y. Xie and Y. R. Zhu, *Sci. China Mater.*, **2017**, *60*, 427-437.
30. D. Dambournet, L. Belharouak and K. Amine, *Inorg. Chem.*, **2010**, *49*, 2822-2826.
31. M. M. Lao, X. T. Lin, P. Li, L. Y. Shao, K. Q. Wu, M. Shui, N. B. Long, Y. L. Ren and J. Shu, *Ceram. Int.*, **2015**, *41*, 2900-2907.

32. K. Q. Wu, J. Shu, X. T. Lin, L. Y. Shao, M. M. Lao, M. Shui, P. Li, N. B. Long and D. J. Wang, *J. Power Sources*, 2014, **272**, 283-290.
33. P. F. Wang, S. S. Qian, T. F. Yi, H. X. Yu, L. Yan, P. Li, X. T. Lin, M. Shui and J. Shu, *ACS Appl. Mater. Interfaces*, 2016, **8**, 10302–10314.
34. H. Lan, S. S. Qian, Q. Wang, L. Yan, H. X. Yu, P. Li, N. B. Long, M. Shu and J. Shu, *Ceram. Int.*, 2017, **43**, 1552-1557.
35. C. Sun, X. Li, X. Z. Wu, C. C. Zhu, H. X. Yu, Z. Y. Guo and J. Shu, *J. Electroanal. Chem.*, 2017, **802**, 100-108.
36. X. Han, X. Gui, W. Tao, X. F. Li and T. F. Yi, *Ceram. Int.*, 2018, **44**, 12273-12281.
